# Supplementary material
Source: Springer Nature journal article supplement (https://www.springermedizin.de/resource/supplementary/12885_2011_3163_MOESM2_ESM.pdf/9462742)

**A**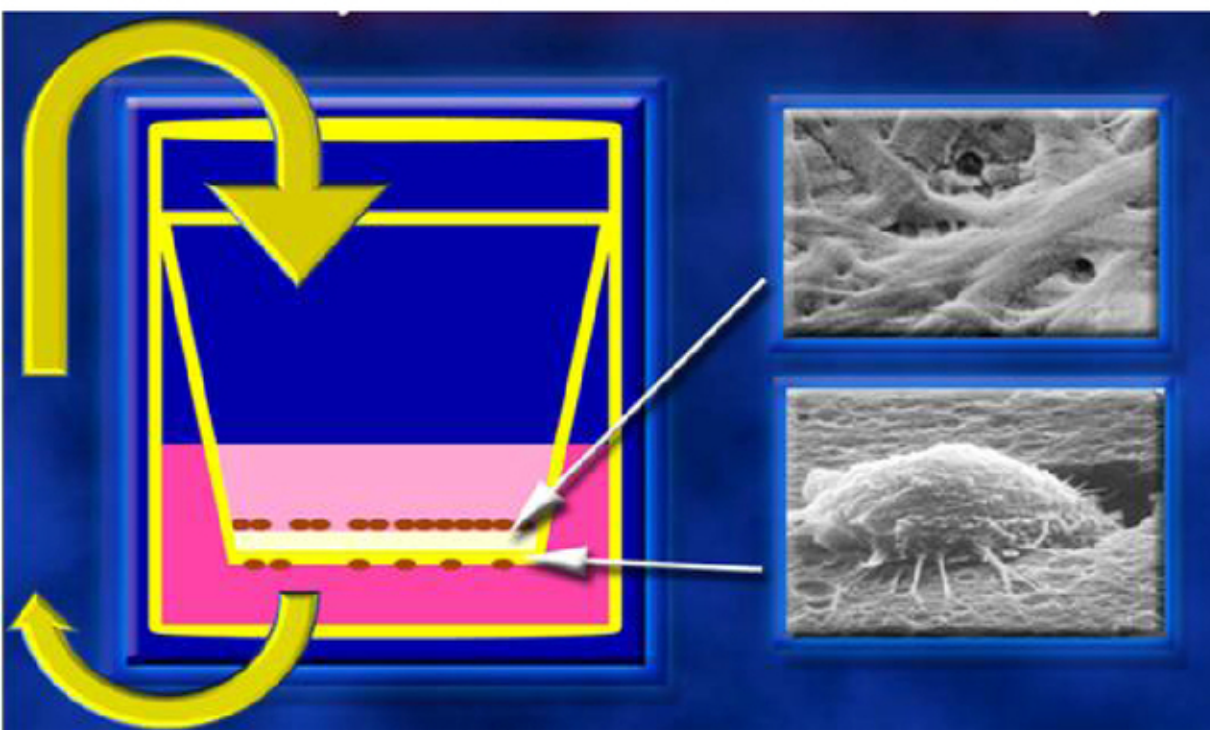**B**

Parental(P)

Invasive (IM3)

U87

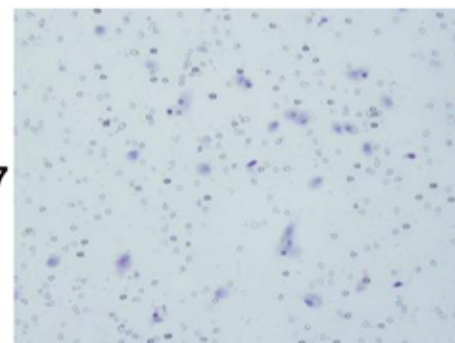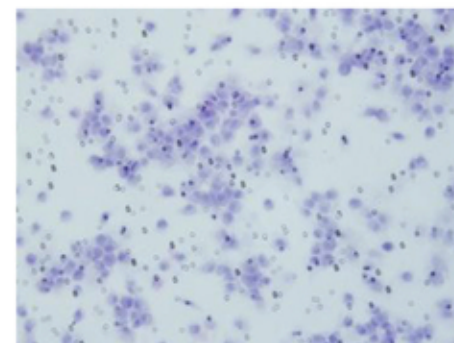

U251

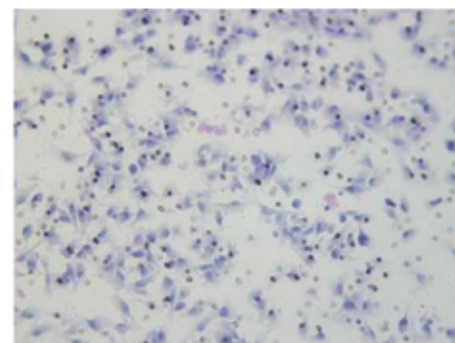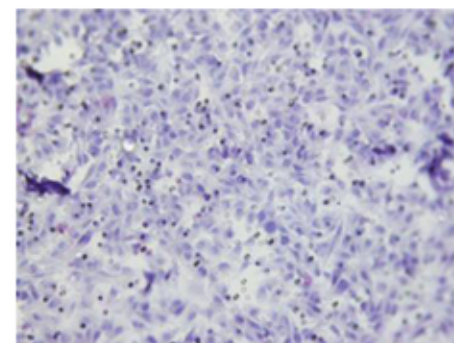

U373

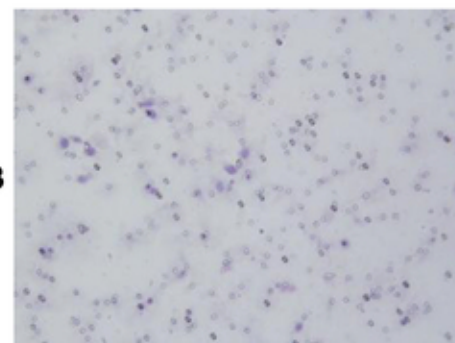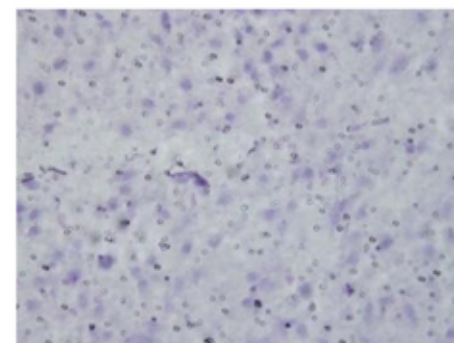

C6

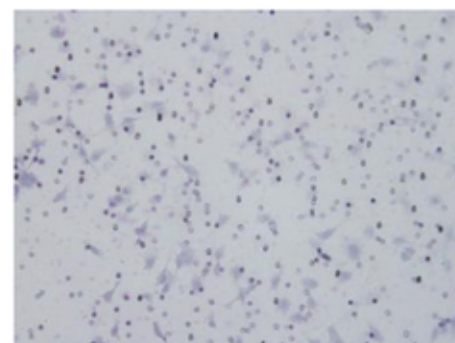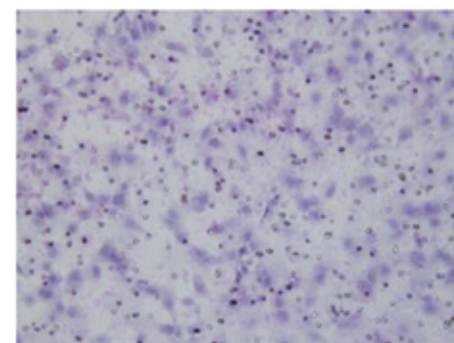

Supplement: MOESM2 [file 9462742]
